# Supplementary material for: Evaluation of Tunisian wheat endophytes as plant growth promoting bacteria and biological control agents against Fusarium culmorum
Source: PubMed Central journal article supplement (PMC11101125; doi:10.1371/journal.pone.0300791), 2024-05-17
Supplement: pone.0300791.s001.pdf [file pone.0300791.s001.pdf]

# S1 Figure

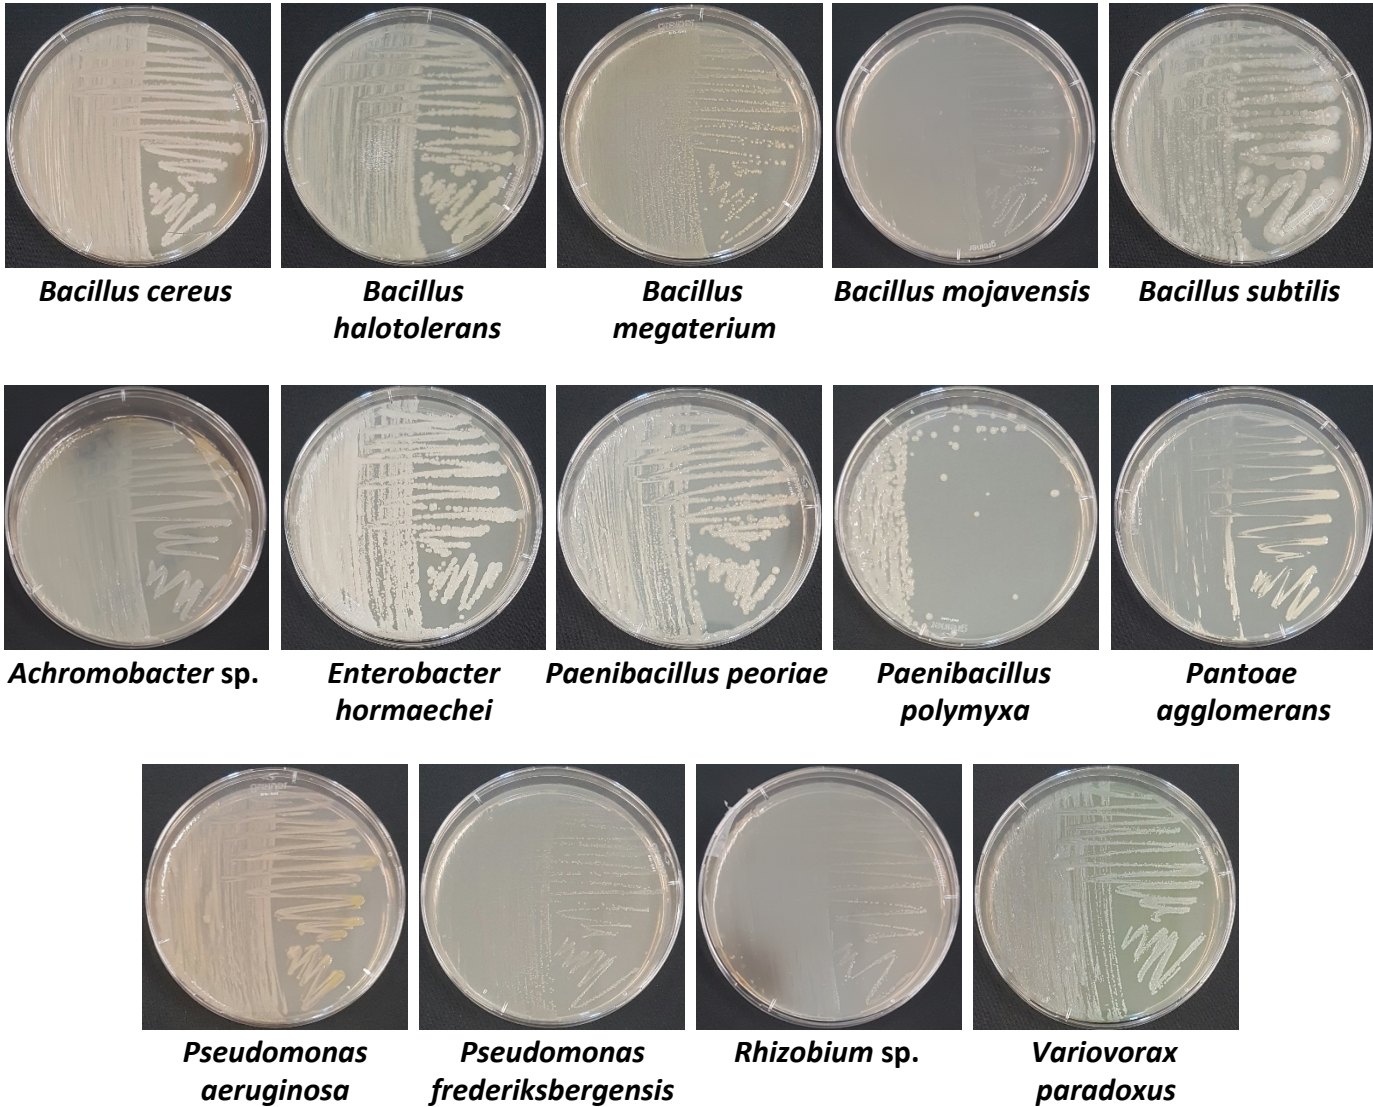

**S1 Figure.** Macroscopic aspect of the 14 isolated bacterial endophytes growing on agar-solidified lysogeny broth (LB) medium after 48 h of incubation at 37°C.
