# Supplementary material for: Evaluation of Tunisian wheat endophytes as plant growth promoting bacteria and biological control agents against Fusarium culmorum
Source: PubMed Central journal article supplement (PMC11101125; doi:10.1371/journal.pone.0300791), 2024-05-17
Supplement: pone.0300791.s002.pdf [file pone.0300791.s002.pdf]

# S2 Figure

**S2 Figure. Macroscopic assessment and quantification of all biochemical activities studied for each strain.**

- Phosphate solubilization
- Zinc solubilization
- Indoles-related Production
- Ammonia Production
- HCN production

## Phosphate solubilization

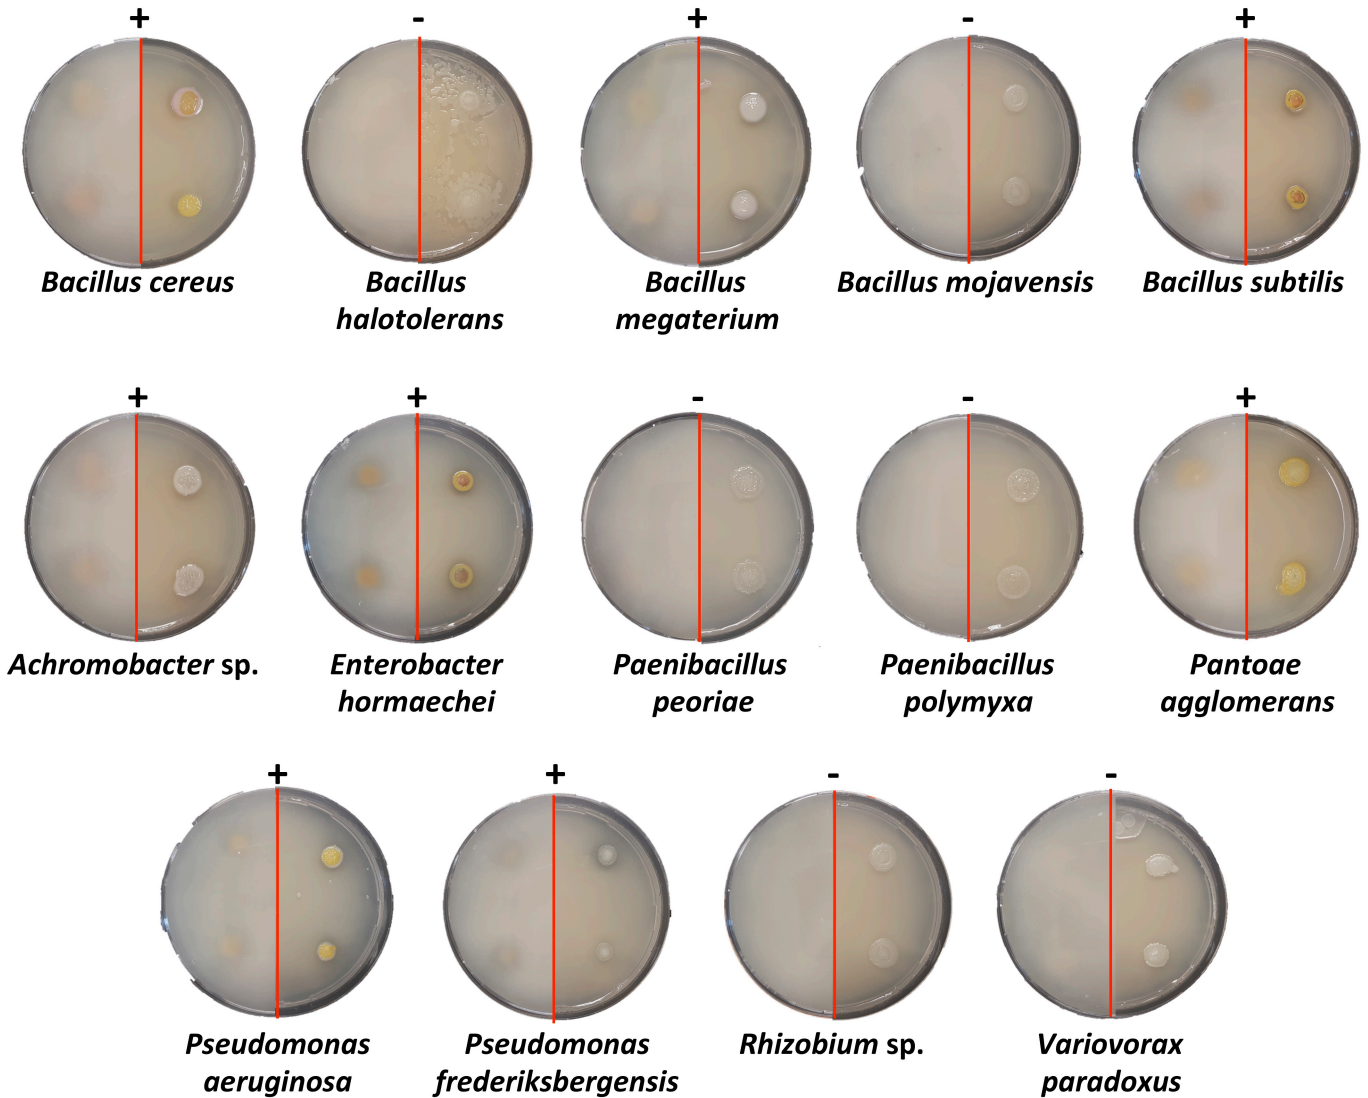

Semi-quantitative calibration of phosphate solubilization by each bacterial endophyte isolated on roots from the old wheat variety Florence Aurore. Each culture is represented by a view from below the box (left part of the red line) and from above the box (right part of the red line). ("-") negative P solubilization; ("+") Positive P solubilization, materialized by a translucent zone around the bacterial colonies.

## Zinc solubilization

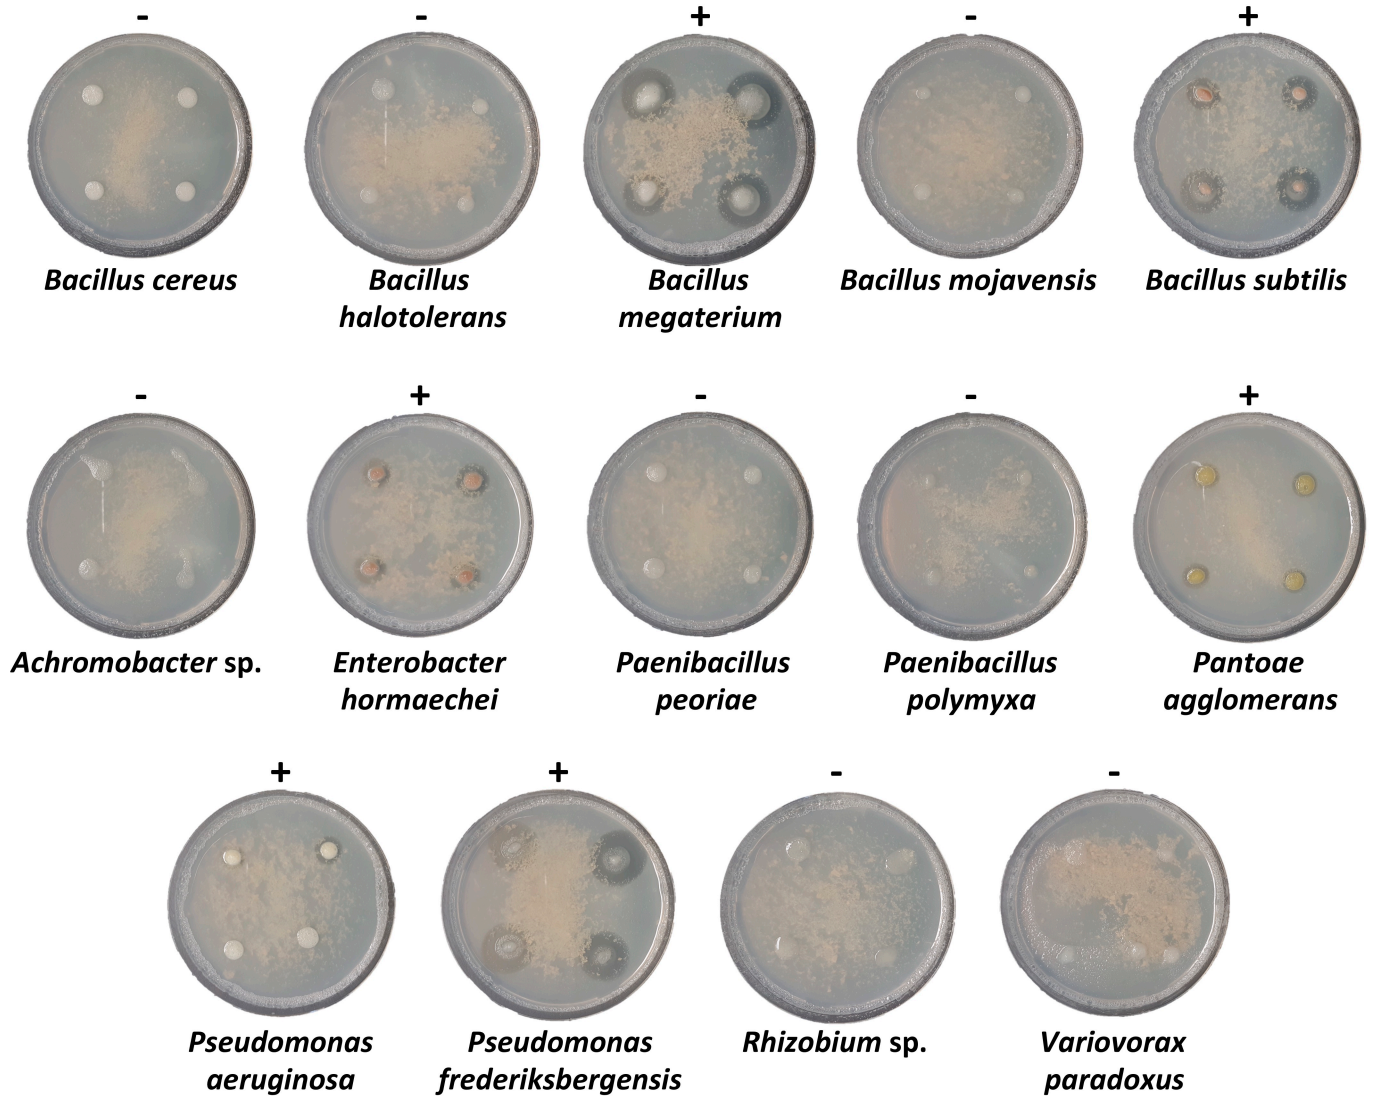

Semi-quantitative calibration of Zinc solubilization by each bacterial endophyte isolated on roots from the old wheat variety Florence Aurore. ("-") Negative Zn solubilization; ("+") Positive Zn solubilization, materialized by a translucent zone around the bacterial colonies.

## Indole-related compounds and ammonia productions

| Control (water)                                                                   | Achromobacter sp.                                                                  | Bacillus cereus                                                                    | Bacillus halotolerans                                                              | Bacillus megaterium                                                                | Bacillus Mojavensis                                                                | Bacillus subtilis                                                                  | Enterobacter hormaechei                                                            | Paenibacillus peoriae                                                              | Paenibacillus polymyxa                                                             | Pantoea agglomerans                                                                 | Pseudomonas aeruginosa                                                               | Rhizobium sp.                                                                        | Variovorax paradoxus                                                                 |
|-----------------------------------------------------------------------------------|------------------------------------------------------------------------------------|------------------------------------------------------------------------------------|------------------------------------------------------------------------------------|------------------------------------------------------------------------------------|------------------------------------------------------------------------------------|------------------------------------------------------------------------------------|------------------------------------------------------------------------------------|------------------------------------------------------------------------------------|------------------------------------------------------------------------------------|-------------------------------------------------------------------------------------|--------------------------------------------------------------------------------------|--------------------------------------------------------------------------------------|--------------------------------------------------------------------------------------|
| <b><u>Indole-related compounds production</u></b>                                 |                                                                                    |                                                                                    |                                                                                    |                                                                                    |                                                                                    |                                                                                    |                                                                                    |                                                                                    |                                                                                    |                                                                                     |                                                                                      |                                                                                      |                                                                                      |
| /                                                                                 | +                                                                                  | +                                                                                  | +                                                                                  | +                                                                                  | +                                                                                  | +                                                                                  | +                                                                                  | +                                                                                  | +                                                                                  | +                                                                                   | +                                                                                    | +                                                                                    | +                                                                                    |
|   |   |   |   |   |   |   |   |   |   |   |   |   |   |
| <b><u>Ammonia production</u></b>                                                  |                                                                                    |                                                                                    |                                                                                    |                                                                                    |                                                                                    |                                                                                    |                                                                                    |                                                                                    |                                                                                    |                                                                                     |                                                                                      |                                                                                      |                                                                                      |
| /                                                                                 | +                                                                                  | +                                                                                  | +                                                                                  | +                                                                                  | +                                                                                  | +                                                                                  | +                                                                                  | +                                                                                  | +                                                                                  | +                                                                                   | +                                                                                    | +                                                                                    | +                                                                                    |
|  |  |  |  |  |  |  |  |  |  |  |  |  |  |

# HCN production

**A**

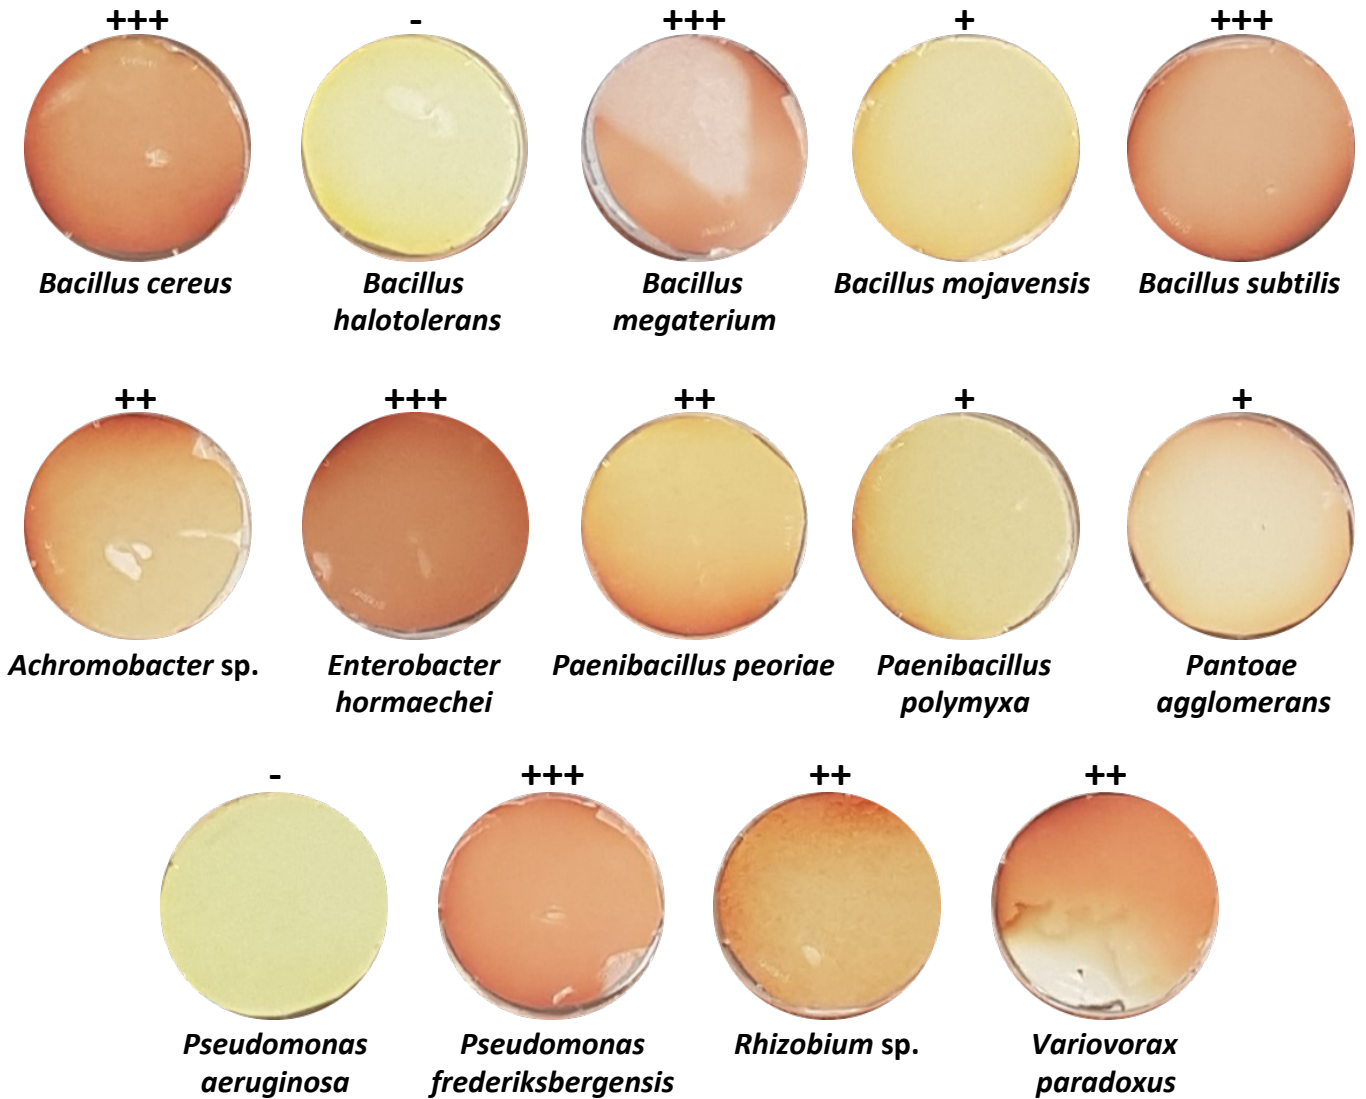

**B**

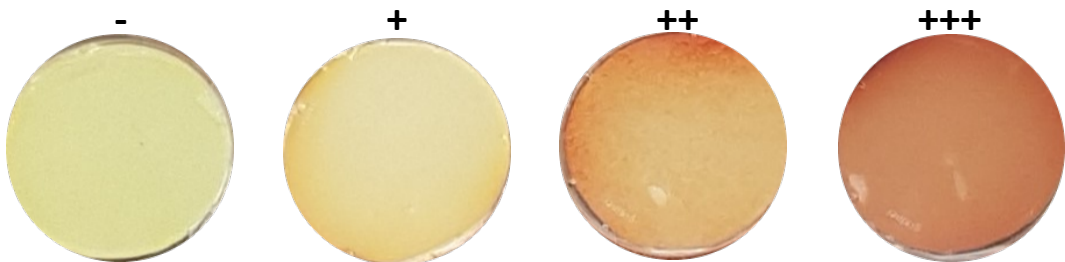

Biochemical capacities (Hydrogen cyanid, HCN) of the bacterial endophytes isolated on roots from the old wheat variety Florence Aurore. (A) HCN production by each endophyte. (B) Semi-quantitative calibration of HCN production ("-", negative production ; "+/++/+++", gradual production of HCN).
