# Supplementary material for: Evaluation of Tunisian wheat endophytes as plant growth promoting bacteria and biological control agents against Fusarium culmorum
Source: PubMed Central journal article supplement (PMC11101125; doi:10.1371/journal.pone.0300791), 2024-05-17
Supplement: pone.0300791.s004.pdf [file pone.0300791.s004.pdf]

**S1 Table.** Primers used for the qPCR amplifications

| Housekeeping genes (5'-3')                        |           |                          |                |
|---------------------------------------------------|-----------|--------------------------|----------------|
| Gene, full name                                   | Acronym   | Primer (5'-3')           | PCR efficiency |
| <i>Actine</i>                                     | ACT FOR   | AGTGGAGGTTCTACCATGTTTCCT | 2.52           |
|                                                   | ACT REV   | CACTGTATTTCCCTTCAGGTGGTG |                |
| <i>Glyceraldehyde-3-Phosphate Dehydrogenase</i>   | GAPDH FOR | AAGGGCATTTTGGGTTACGTT    | 2.01           |
|                                                   | GAPDH REV | CCTGTTGTACCCCTGGAAGTC    |                |
| <i>RNaseL inhibitor-like</i>                      | RLI FOR   | TTGAGCAACTCATGGACCAG     | 2.09           |
|                                                   | RLI REV   | GCTTTCCAAGGCACAAACAT     |                |
| <i>Heterogeneous nuclear ribonucleoprotein</i>    | RNP FOR   | TCACCTTGCCAAAGCTCAGAACTA | 2.05           |
|                                                   | RNP REV   | AGTTGAACTTGCCCGAAC       |                |
| <i>26S ribosomal RNA</i>                          | 26S FOR   | GCTGGCTCGTTCAACTGATG     | 2.15           |
|                                                   | 26S REV   | GGACCAAGCGTTCTGATTACTC   |                |
| Target genes (5'-3')                              |           |                          |                |
| Gene, full name                                   | Acronym   | Primer (5'-3')           | PCR efficiency |
| <i>Allene oxide synthase</i>                      | AOS FOR   | AGGCCGGAGAGAAGTTCCAC     | 1.92           |
|                                                   | AOS REV   | CCGACTTGGTCAGTCCATC      |                |
| <i>Aminocyclopropane (ACC) synthase</i>           | ACS1 FOR  | GAGGTTGTGAACGAGCTAGAAG   | 1.89           |
|                                                   | ACS1 REV  | CTCGAAACCCTGCAAGAGATAG   |                |
| <i>Aquaporin (PIP-like)</i>                       | AQP FOR   | TGGTCAGACCACTGGATCTTC    | 2.07           |
|                                                   | AQP REV   | TGGCATCTTCTTTGCAGCAG     |                |
| <i>Catalase</i>                                   | CAT FOR   | CACCTGGTGGAGAAGATCGC     | 1.96           |
|                                                   | CAT REV   | TCACCTCGAAGAAGCCCTTG     |                |
| <i>Chitinase (PR-4)</i>                           | CHT FOR   | GGGTGGACCTGTGAACAAT      | 2.02           |
|                                                   | CHT REV   | AGAACCATATCGCCGTCTTGA    |                |
| <i>Cytokinin oxidases/dehydrogenase</i>           | CKX FOR   | GGAGGTGGCGCTGGACAAGATC   | 1.91           |
|                                                   | CKX REV   | GCAGAACCAGTATCTTCTGGT    |                |
| <i>Defensin (PR-12)</i>                           | DEF FOR   | ATGTCCGTGCCTTTTGCTA      | 1.93           |
|                                                   | DEF REV   | CCAAACTACCGAGTCCCG       |                |
| <i>Isopentenyltransferase 5</i>                   | IPT5 FOR  | CGAACTAGCTGTCATGCCATAG   | 2.07           |
|                                                   | IPT5 REV  | AGAGCTTGACCGTAGCAGTA     |                |
| <i>Enhanced Disease Susceptibility 1</i>          | EDS1 FOR  | TACATGAGGCACCTGCCGCAGT   | 2.01           |
|                                                   | EDS1 REV  | GGTTCAACTCCAGGGCTTCGTTG  |                |
| <i>glucan synthase-like 22 (callose synthase)</i> | GSL22 FOR | GTCTGGGGGCGATTTTA        | 2.18           |
|                                                   | GSL22 REV | GCTGTATGACGAAGTCTGA      |                |
| <i>Heat Shock Protein 70-like (HSP-70)</i>        | HSP70 FOR | CGACTCGGAGCGTCTCATC      | 1.72           |
|                                                   | HSP REV   | TGTCACTCTGACAGGGCATCA    |                |
| <i>Lipid transfer protein (PR-14)</i>             | LTP FOR   | ACGTAGGTAATCTCTCGCTGT    | 2.19           |
|                                                   | LTP REV   | GTTGATCGACCACTTCTTCTCA   |                |
| <i>Lipoxygenase</i>                               | LOX FOR   | GGGCACCAAGGAGTACAAGGA    | 2.18           |
|                                                   | LOX REV   | GCTCGTATGGTGTGGATGA      |                |
| <i>Receptor Like Kinase (LRR-RLK class)</i>       | RLK FOR   | TGCTGCATTCTGATCAAGG      | 2.01           |
|                                                   | RLK REV   | GGTGAAATTTGGTGTGCAC      |                |
| <i>Mitogen-activated protein kinase 3</i>         | MAPK3 FOR | TACATGAGGCACCTGCCGCAGT   | 2.32           |
|                                                   | MAPK3 REV | GGTTCAACTCCAGGGCTTCGTTG  |                |
| <i>Non Expresser of Pathogenesis Related 1</i>    | NPR1 FOR  | GCTTGTCAAGGATGCTGCTC     | 1.78           |
|                                                   | NPR1 REV  | GAACAGTATAACCTCTTGGGTTTC |                |
| <i>Phenylalanine ammonia lyase</i>                | PAL FOR   | GGCCACAATAATCGAAGTTATTC  | 2.09           |
|                                                   | PAL REV   | GGAAGTTGCCACCGTGGAT      |                |
| <i>Polyphenol oxydase</i>                         | PPO FOR   | GTCCGGACGAACAAGAAGAA     | 2.09           |
|                                                   | PPO REV   | GGCGATGCTTCACTTGGTAT     |                |
| <i>Peroxydase (PR-9)</i>                          | POX FOR   | TGCTTTGTCCAAGGCTGTGA     | 1.97           |
|                                                   | POX REV   | GACCCGCTTTTGTCCA         |                |
| <i>Pathogenesis related Protein 1 (PR-1)</i>      | PR-1 FOR  | GAATGCAGACGCCCAAGCTA     | 1.78           |
|                                                   | PR-1 REV  | GCACGGGCAGCGTTGT         |                |
| <i>Pathogenesis related Protein 5 (PR-5)</i>      | PR5 FOR   | CGTTGATGCTCGGGGCGCCG     | 1.87           |
|                                                   | PR5 REV   | AATTCGCCTCAAGACCTCAC     |                |
| <i>Pathogenesis related Protein 17 (PR-17)</i>    | PR-17 FOR | CATCTGGACCACCTTCAACCA    | 1.97           |
|                                                   | PR-17 REV | ACTGGGCTCGGAGTTGGATA     |                |
| <i>Superoxide dismutase</i>                       | SOD FOR   | CGATAGCCAGATTCTTTGACT    | 2.11           |
|                                                   | SOD REV   | GAAACCAGCGACCTACAACG     |                |
| <i>Sesquiterpene synthase</i>                     | SqTS FOR  | GGAAAGACATGGTGCACACA     | 1.82           |
|                                                   | SqTS REV  | GATCTCGTGCGAGGAAGTG      |                |
| <i>sulphur-rich Thionin-like (PR-13)</i>          | THIO FOR  | TGCATCGACAAGACCGAAAA     | 1,78           |
|                                                   | THIO REV  | ACGCATTGCAAAAGCACTTC     |                |
| <i>Wall-associated Kinase 6</i>                   | WAK6 FOR  | AGAACCTCTCGTCCACTTC      | 2.14           |
|                                                   | WAK6 REV  | CCTTAGCTGCCAAGCTCTT      |                |
